# Supplementary material for: Development of a Modified QuEChERS Method Based on Magnetic Multi-Walled Carbon Nanotubes as a Clean-Up Adsorbent for the Analysis of Heterocyclic Aromatic Amines in Braised Sauce Beef
Source: MDPI journal article supplement (doi:10.3390/foods12010138), 2022-12-27
Supplement: s1 [file s1]

# **Development of a Modified QuEChERS method based on Magnetic Multiwalled Carbon Nanotubes as a Clean-up Adsorbent for the Analysis of Heterocyclic Aromatic Amines in Braised Sauce Beef**

**Min Li <sup>1</sup>, Pengxiang Wang <sup>1</sup>, Xu Zhang <sup>1</sup>, Hongyu Wang <sup>1</sup>, Ke Li <sup>1</sup>, Yanhong Bai <sup>1,2,\*</sup>**

<sup>1</sup> College of Food and Bioengineering, Zhengzhou University of Light Industry, Zhengzhou 450001, China

<sup>2</sup> Henan Key Laboratory of Cold Chain Food Quality and Safety Control, Zhengzhou 450001, China

\* Correspondence: baiyanhong212@163.com

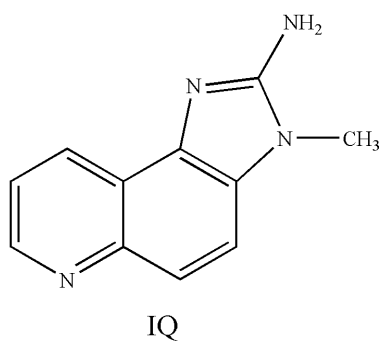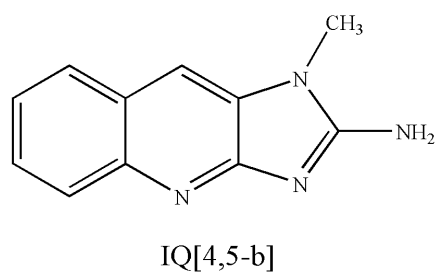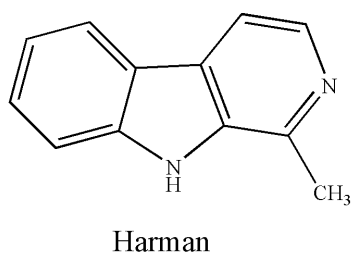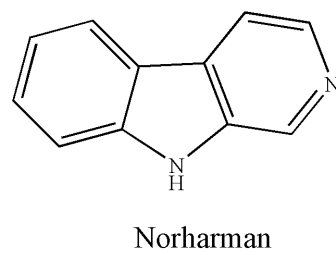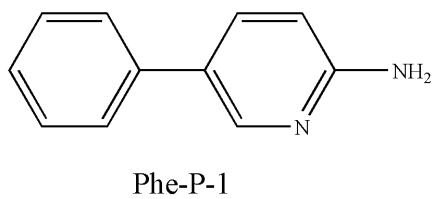

**Figure S1.** Chemical structures of the studied HAAs.

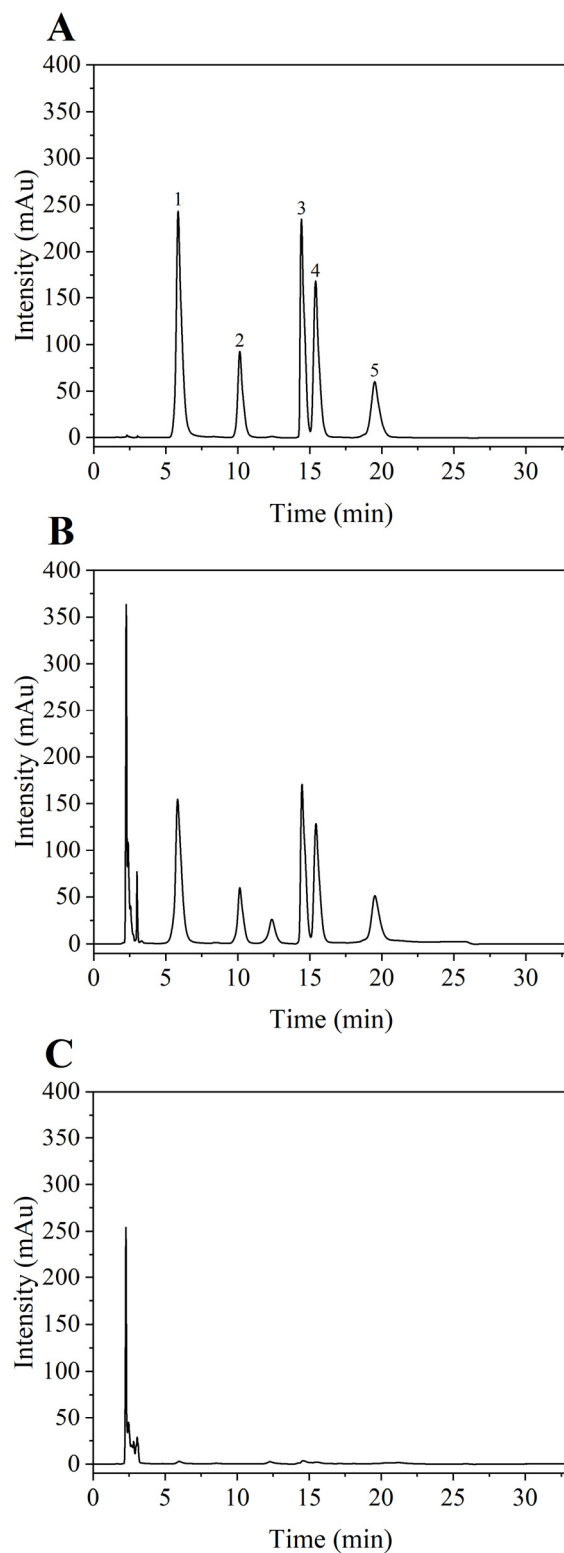

**Figure S2.** Chromatograms of the mixed standard solution (**A**), the spiked braised sauce beef extract (**B**) and the blank braised sauce beef extract (**C**) prepared with the proposed QuEChERS method. Peak assignments: (1) IQ, (2) IQ[4,5-b], (3) Harman, (4) Norharman, (5) Phe-P-1. Spiked concentrations, 1.0  $\mu\text{g/g}$  for IQ, Harman and Norharman, 0.5  $\mu\text{g/g}$  for IQ[4,5-b] and Phe-P-1.

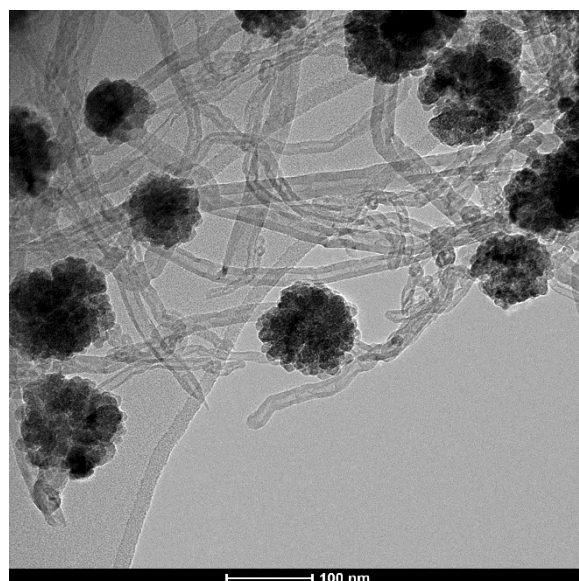

**Figure S3.** TEM image of Fe<sub>3</sub>O<sub>4</sub>-MWCNTs.

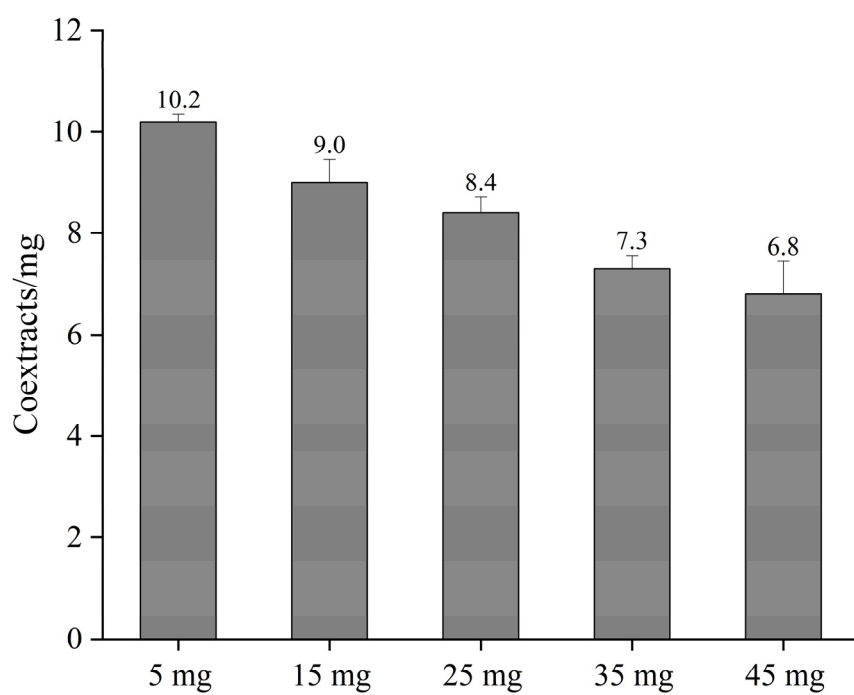

**Figure S4.** Amount of co-extracted matrix obtained through gravimetric analysis after purification with different amounts of Fe<sub>3</sub>O<sub>4</sub>-MWCNTs in the QuEChERS method (n = 3).

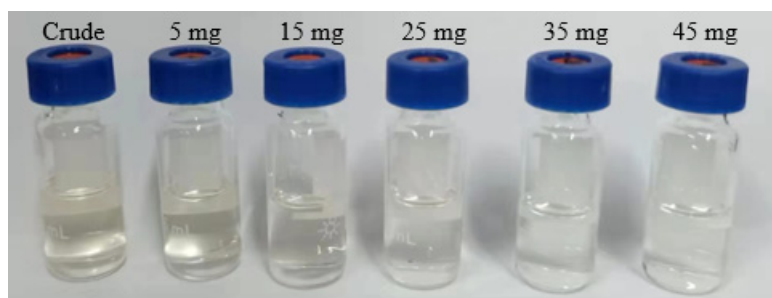

**Figure S5.** Photographs of braised sauce beef extract after purification with different amounts of Fe<sub>3</sub>O<sub>4</sub>-MWCNTs.

**Table S1.** HAAs measured in analyzed braised sauce beef samples.

| <b>Samples</b> | <b>IQ</b>         | <b>IQ[4,5-b]</b> | <b>Harman</b> | <b>Norharman</b> | <b>Phe-P-1</b> |
|----------------|-------------------|------------------|---------------|------------------|----------------|
| Beef 1         | n.q. <sup>1</sup> | -                | n.q.          | n.q.             | -              |
| Beef 5         | n.q.              | -                | -             | -                | -              |
| Beef 8         | n.q.              | -                | n.q.          | n.q.             | -              |
| Beef 13        | n.q.              | -                | n.q.          | n.q.             | -              |
| Beef 14        | n.q.              | -                | n.q.          | n.q.             | -              |

<sup>1</sup> n.q.-not quantified (<LOQ), HAAs could be detected but not quantified.
